# Supplementary material for: An Immune-Related Gene Prognostic Index for Triple-Negative Breast Cancer Integrates Multiple Aspects of Tumor-Immune Microenvironment
Source: MDPI journal article supplement (doi:10.3390/cancers13215342), 2021-10-25
Supplement: s1 [file s1]

# An Immune-Related Gene Prognostic Index for Triple-Negative Breast Cancer Integrates Multiple Aspects of Tumor-Immune Microenvironment

Xiaowei Wang <sup>1</sup>, Wenjia Su <sup>2</sup>, Dabei Tang <sup>1</sup>, Jing Jing <sup>1</sup>, Jing Xiong <sup>3</sup>, Yuwei Deng <sup>1</sup>, Huili Liu <sup>1</sup>, Wenjie Ma <sup>1</sup>, Zhaoliang Liu <sup>4,5,\*</sup> and Qingyuan Zhang <sup>1,\*</sup>

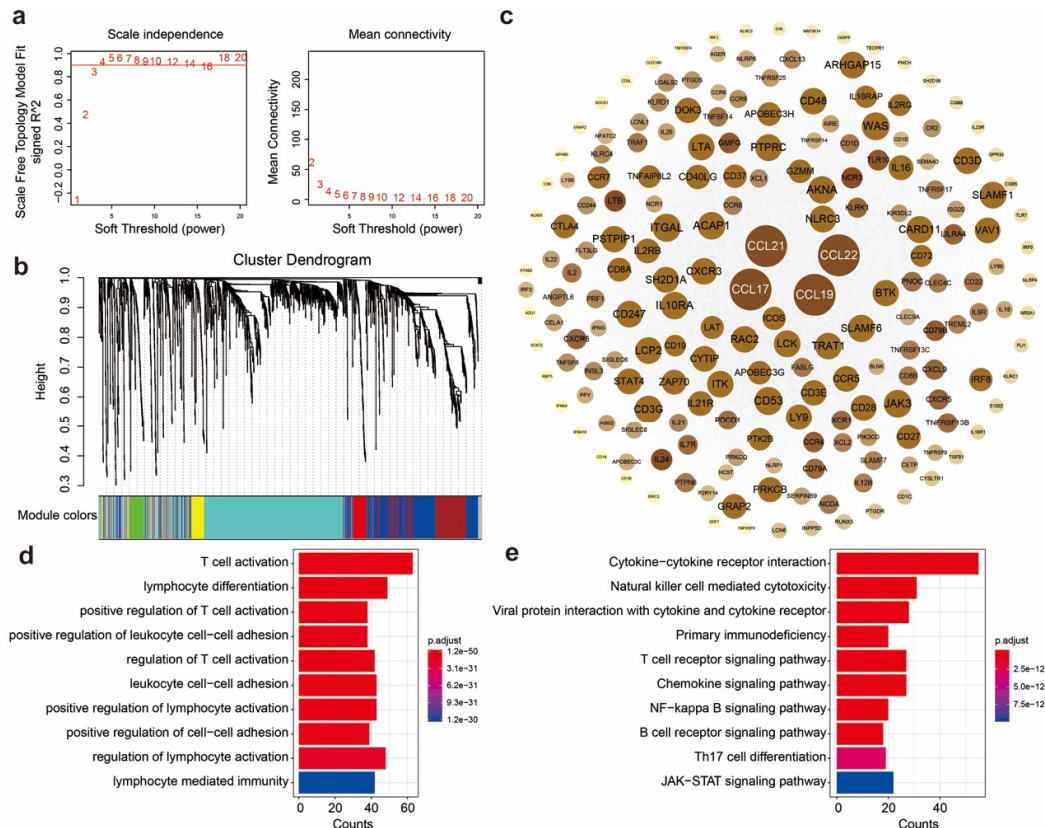

**Figure S1.** Identify co-expressed immune genes related to CC chemokine genes by WGCNA. (a) Selection of Soft Threshold in WGCNA analysis; (b) Gene distribution in WGCNA network analysis; (c) Co-expression network of genes in the brown module; (d) GO enrichment of genes in the brown module of co-expression network; (e) KEGG enrichment of genes in the brown module of co-expression network.

**a**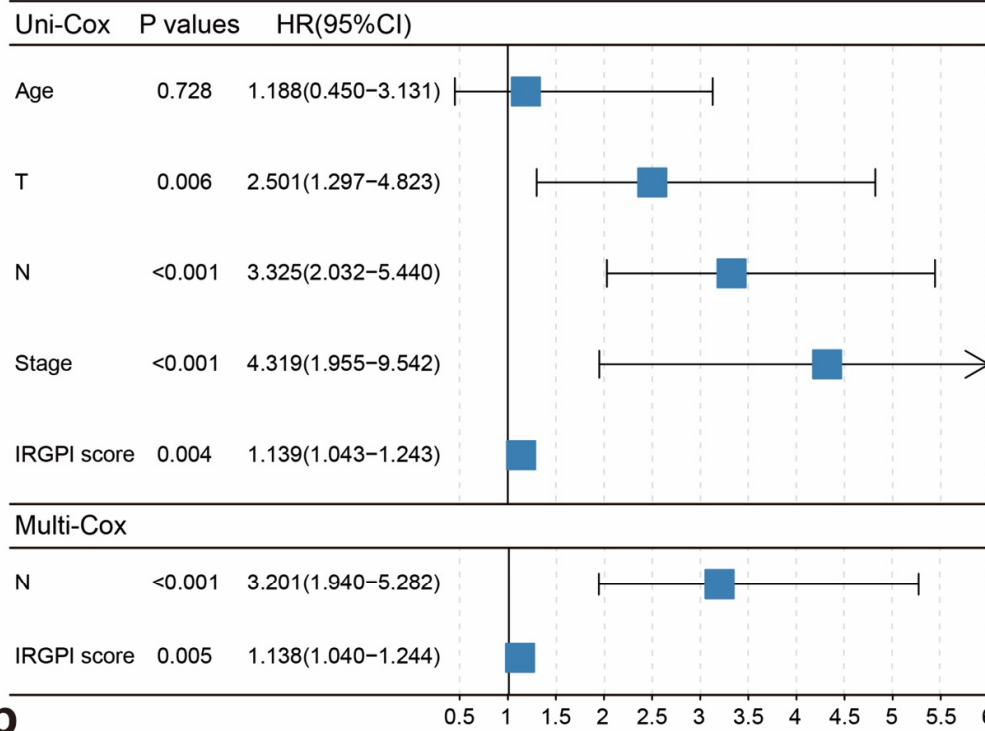**b**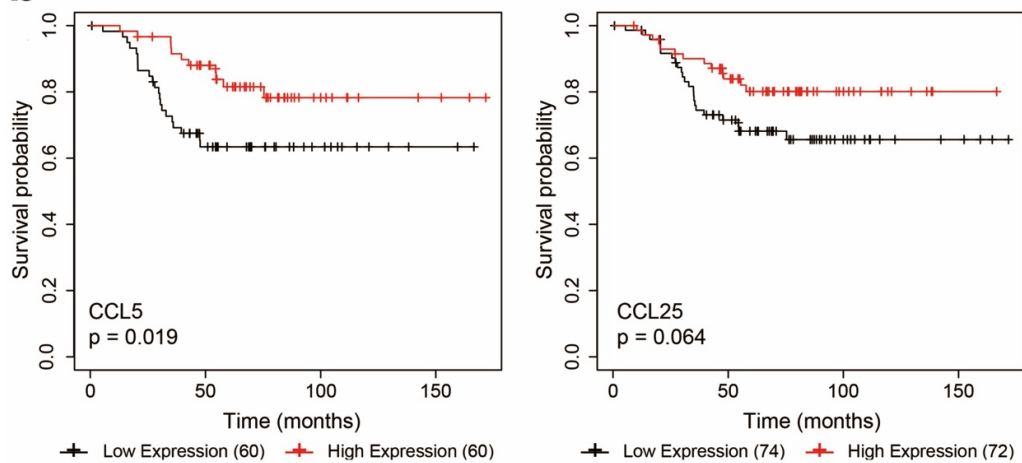

**Figure S2.** Validation of the prognostic value of IRGPI. **(a)** Univariate and multivariate Cox analysis of clinicopathological factors and the IRGPI scores ( $p < 0.05$ ); **(b)** Effect of CCL5 and CCL25 expression on the survival in TNBC cohort of Kaplan-Meier plotter database.

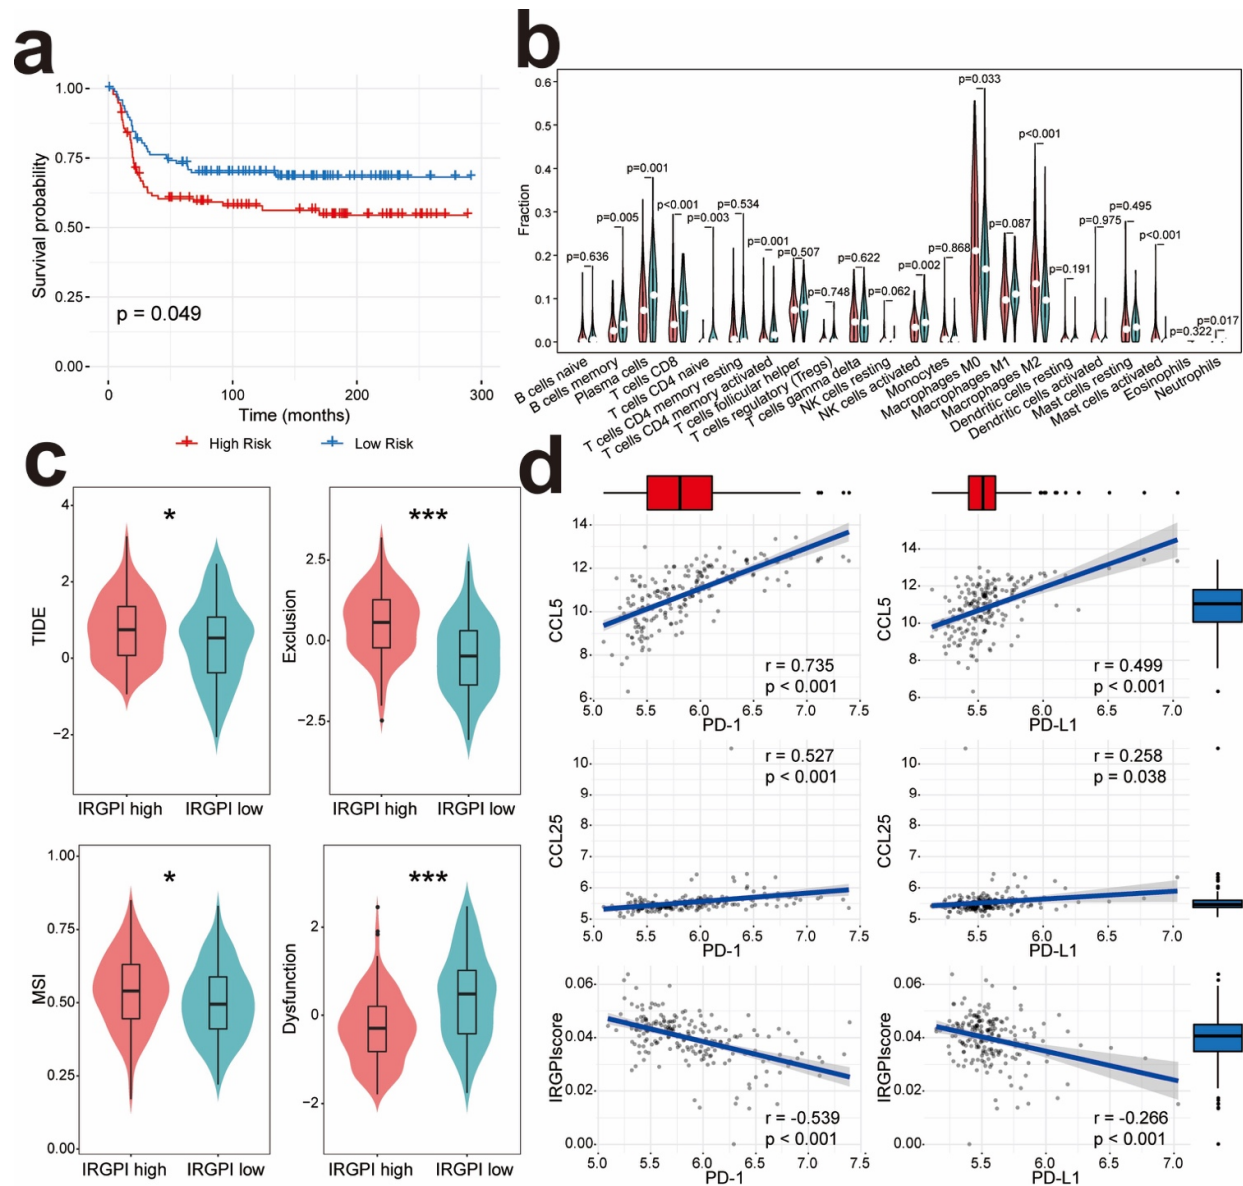

**Figure S3.** Validation of the prognostic value of IRGPI and its associations with immune characteristics in METABRIC database. (a) Kaplan-Meier survival analysis of IRGPI scores using METABRIC data ( $p < 0.05$ ); (b) The difference of immune cell infiltration in different IRGPI groups (pink: IRGPI-high group; and blue: IRGPI-low group). (c) Scores of TIDE, MSI, and T cell exclusion and dysfunction in different IRGPI groups (ns: not significant,  $*p < 0.05$ ;  $**p < 0.01$ ;  $***p < 0.001$ ); (d) Correlations between CCL5/CCL25/IRGPI scores and PD-L1/PD1 expression.

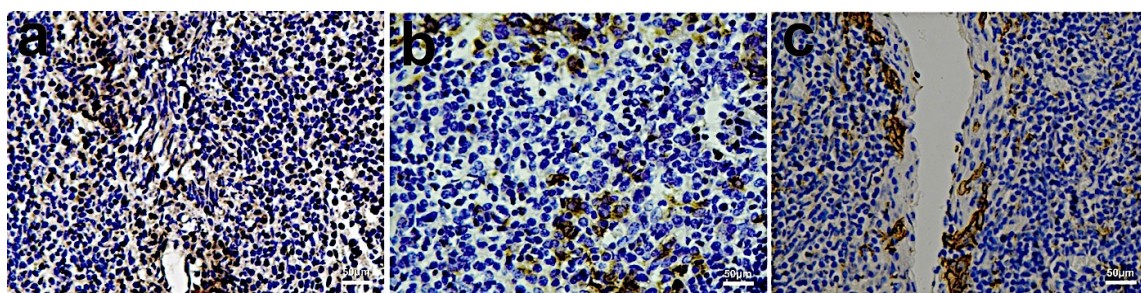

**Figure S4.** Pictures of CCL5, CCL25 and PD-L1 immunohistochemistry using the known tissue positive for CCL5, CCL25, and PD-L1. (a) CCL5 IHC in Tonsil; (b) CCL25 IHC in Thymus; (c) PD-L1 IHC in Tonsil. Scale bar: 50µm.
